# Supplementary material for: Perfect health not so perfect after all – a methodological study on patient-reported outcome measures in 2574 patients following percutaneous coronary intervention
Source: Springer Nature journal article supplement (doi:10.1186/s12955-025-02360-4), 2025-04-05
Supplement: MOESM1 [file 12955_2025_2360_MOESM1_ESM.pdf]

**Supplemental Table 1.** Frequency of perfect scorers on the generic EQ-5D-5L to each response category on single items on the disease-specific Myocardial Infarction Dimensional Assessment Scale (MIDAS).

| Following you heart attack, how often during the last week have you...                       |         | Never      | Occasionally | Sometimes  | Often    | Always  |
|----------------------------------------------------------------------------------------------|---------|------------|--------------|------------|----------|---------|
|                                                                                              | Country | n (%)      | n (%)        | n (%)      | n (%)    | n (%)   |
| Thought twice before you undertook physical activity (e.g. housework or going to the shops)? | D       | 248 (71.5) | 69 (19.9)    | 20 (5.8)   | 7 (2.0)  | 3 (0.9) |
|                                                                                              | N       | 298 (64.1) | 113 (24.3)   | 44 (9.5)   | 10 (2.2) | 0 (0.0) |
| Had angina symptoms (e.g. chest pain or tightness)?                                          | D       | 265 (76.6) | 69(19.9)     | 12 (3.5)   | 0 (0.0)  | 0 (0.0) |
|                                                                                              | N       | 382 (82.9) | 60 (13.0)    | 16 (3.5)   | 0 (0.0)  | 3 (0.7) |
| Had angina (chest pain or tightness) that affected your life?                                | D       | 303 (88.1) | 37 (10.8)    | 3 (0.9)    | 0 (0.0)  | 1 (0.3) |
|                                                                                              | N       | 414 (90.2) | 33 (7.2)     | 8 (1.7)    | 0 (0.0)  | 4 (0.9) |
| Felt slowed down?                                                                            | D       | 243 (70.2) | 90 (26.0)    | 12 (3.5)   | 0 (0.0)  | 1 (0.3) |
|                                                                                              | N       | 181 (39.0) | 165 (35.6)   | 99 (21.3)  | 18 (3.9) | 1 (0.2) |
| Had no energy?                                                                               | D       | 147 (42.5) | 134 (38.7)   | 58 (16.8)  | 5 (1.4)  | 2 (0.6) |
|                                                                                              | N       | 143 (30.9) | 176 (38.0)   | 121 (26.1) | 22 (4.8) | 1 (0.2) |
| Been breathless?                                                                             | D       | 178 (51.6) | 101 (29.3)   | 57 (16.5)  | 9 (2.6)  | 0 (0.0) |
|                                                                                              | N       | 188 (40.6) | 138 (29.8)   | 106 (22.9) | 26 (5.6) | 5 (1.1) |
| Had chest pain or tightness when undertaking physical activity?                              | D       | 280 (80.9) | 55 (15.9)    | 10 (2.9)   | 0 (0.0)  | 1 (0.3) |
|                                                                                              | N       | 358 (77.0) | 73 (15.7)    | 29 (6.2)   | 2 (0.4)  | 3 (0.6) |
| Felt frustrated at your limitations?                                                         | D       | 259 (74.9) | 59 (17.1)    | 25 (7.2)   | 2 (0.6)  | 1 (0.3) |
|                                                                                              | N       | 318 (68.8) | 95 (20.6)    | 40 (8.7)   | 9 (1.9)  | 0 (0.0) |
| Needed to rest more?                                                                         | D       | 133 (38.4) | 106 (30.6)   | 89 (25.7)  | 16 (4.6) | 2 (0.6) |
|                                                                                              | N       | 162 (35.0) | 151 (32.6)   | 119 (25.7) | 27 (5.8) | 4 (0.9) |
| Felt you have a reduced social life?                                                         | D       | 288 (83.5) | 47 (13.6)    | 9 (2.6)    | 0 (0.0)  | 1 (0.3) |
|                                                                                              | N       | 369 (79.5) | 67 (14.4)    | 25 (5.4)   | 1 (0.2)  | 2 (0.4) |
| Felt you cannot perform your domestic duties?                                                | D       | 252 (72.8) | 67 (19.4)    | 24 (6.9)   | 1 (0.3)  | 2 (0.6) |
|                                                                                              | N       | 384 (82.4) | 64 (13.7)    | 12 (2.6)   | 2 (0.4)  | 4 (0.9) |
| Found the weather made your pain worse?                                                      | D       | 315 (91.3) | 22 (6.4)     | 7 (2.0)    | 0 (0.0)  | 1 (0.3) |
|                                                                                              | N       | 409 (87.8) | 43 (9.2)     | 12 (2.6)   | 2 (0.4)  | 0 (0.0) |
| Felt frightened you will have another heart attack?                                          | D       | 234 (67.6) | 85 (24.6)    | 25 (7.2)   | 1 (0.3)  | 1 (0.3) |
|                                                                                              | N       | 314 (67.7) | 107 (23.1)   | 41 (8.8)   | 2 (0.4)  | 0 (0.0) |
| Felt isolated?                                                                               | D       | 324 (93.6) | 19 (5.5)     | 2 (0.6)    | 0 (0.0)  | 1 (0.3) |
|                                                                                              | N       | 418 (89.7) | 33 (7.1)     | 13 (2.8)   | 1 (0.2)  | 1 (0.2) |

|                                                  |   |            |            |           |          |         |
|--------------------------------------------------|---|------------|------------|-----------|----------|---------|
| Felt lonely?                                     | D | 322 (93.1) | 20 (5.8)   | 3 (0.9)   | 0 (0.0)  | 1 (0.3) |
|                                                  | N | 404 (87.1) | 41 (8.8)   | 15 (3.2)  | 3 (0.6)  | 1 (0.2) |
| Felt anxious about travelling?                   | D | 283 (82.0) | 46 (13.3)  | 15 (4.3)  | 0 (0.0)  | 1 (0.3) |
|                                                  | N | 359 (77.2) | 80 (17.2)  | 25 (5.4)  | 1 (0.2)  | 0 (0.0) |
| Felt vulnerable?                                 | D | 278 (80.6) | 53 (15.4)  | 13 (3.8)  | 0 (0.0)  | 1 (0.3) |
|                                                  | N | 347 (74.6) | 92 (19.8)  | 24 (5.2)  | 2 (0.4)  | 0 (0.0) |
| Felt insecure?                                   | D | 285 (82.4) | 53 (15.3)  | 7 (2.0)   | 0 (0.0)  | 1 (0.3) |
|                                                  | N | 351 (75.6) | 94 (20.3)  | 17 (3.7)  | 1 (0.2)  | 1 (0.2) |
| Felt your confidence has been affected?          | D | 265 (76.6) | 57 (16.5)  | 21 (6.1)  | 2 (0.6)  | 1 (0.3) |
|                                                  | N | 351 (75.6) | 83 (17.9)  | 28 (6.0)  | 1 (0.2)  | 1 (0.2) |
| Felt anxious about dying?                        | D | 274 (79.2) | 61 (17.6)  | 9 (2.6)   | 1 (0.3)  | 1 (0.3) |
|                                                  | N | 404 (87.3) | 45 (9.7)   | 13 (2.8)  | 1 (0.2)  | 0 (0.0) |
| Worried or felt anxious about the future?        | D | 245 (71.0) | 78 (22.6)  | 19 (5.5)  | 2 (0.6)  | 1 (0.3) |
|                                                  | N | 307 (65.9) | 127 (27.3) | 31 (6.7)  | 1 (0.2)  | 0 (0.0) |
| Felt irritable?                                  | D | 233 (67.3) | 88 (25.4)  | 24 (6.9)  | 0 (0.0)  | 1 (0.3) |
|                                                  | N | 260 (55.8) | 152 (32.6) | 51 (10.9) | 3 (0.6)  | 0 (0.0) |
| Felt down or depressed?                          | D | 282 (81.5) | 54 (15.6)  | 9 (2.6)   | 0 (0.0)  | 1 (0.3) |
|                                                  | N | 351 (75.6) | 96 (20.7)  | 16 (3.4)  | 1 (0.2)  | 0 (0.0) |
| Felt bad tempered?                               | D | 260 (75.1) | 69 (19.9)  | 16 (4.6)  | 0 (0.0)  | 1 (0.3) |
|                                                  | N | 273 (58.7) | 151 (32.5) | 40 (8.6)  | 1 (0.2)  | 0 (0.0) |
| Felt stressed?                                   | D | 257 (74.3) | 78 (22.5)  | 10 (2.9)  | 0 (0.0)  | 1 (0.3) |
|                                                  | N | 273 (59.0) | 135 (29.2) | 50 (10.8) | 4 (0.9)  | 1 (0.2) |
| Felt your family or friends are over protective? | D | 229 (66.4) | 81 (23.5)  | 28 (8.1)  | 4 (1.2)  | 3 (0.9) |
|                                                  | N | 260 (56.0) | 114 (24.6) | 79 (17.0) | 10 (2.2) | 1 (0.2) |
| Felt you have lost your independence?            | D | 320 (92.5) | 18 (5.2)   | 7 (2.0)   | 0 (0.0)  | 1 (0.3) |
|                                                  | N | 376 (81.2) | 69 (14.9)  | 14 (3.0)  | 2 (0.4)  | 2 (0.4) |
| Felt you have to rely on others?                 | D | 290 (83.8) | 43 (12.4)  | 11 (3.2)  | 1 (0.3)  | 1 (0.3) |
|                                                  | N | 341 (74.0) | 86 (18.7)  | 31 (6.7)  | 1 (0.2)  | 2 (0.4) |
| Felt concerned about your diet?                  | D | 238 (68.8) | 68 (19.7)  | 35 (10.1) | 4 (1.2)  | 1 (0.3) |
|                                                  | N | 297 (64.0) | 116 (25.0) | 45 (9.7)  | 5 (1.1)  | 1 (0.2) |
| Felt concerned about your cholesterol level?     | D | 189 (54.8) | 106 (30.7) | 40 (11.6) | 7 (2.0)  | 3 (0.9) |
|                                                  | N | 257 (55.2) | 132 (28.3) | 63 (13.5) | 10 (2.1) | 4 (0.9) |
| Worried about your weight?                       | D | 189 (54.6) | 94 (27.2)  | 42 (12.1) | 18 (5.2) | 3 (0.9) |
|                                                  | N | 224 (48.3) | 126 (27.2) | 84 (18.1) | 25 (5.4) | 5 (1.1) |

|                                                                                                        |   |            |            |            |           |         |
|--------------------------------------------------------------------------------------------------------|---|------------|------------|------------|-----------|---------|
| Worried about taking tablets?                                                                          | D | 194 (56.1) | 85 (24.6)  | 52 (15.0)  | 12 (3.5)  | 3 (0.9) |
|                                                                                                        | N | 188 (40.3) | 127 (27.3) | 122 (26.2) | 23 (4.9)  | 6 (1.3) |
| Worried about side effects from your tablets?                                                          | D | 142 (41.0) | 109 (31.5) | 70 (20.2)  | 20 (5.8)  | 5 (1.4) |
|                                                                                                        | N | 159 (34.3) | 145 (31.3) | 123 (26.6) | 30 (6.5)  | 6 (1.3) |
| Felt the cold more?                                                                                    | D | 241 (69.9) | 46 (13.3)  | 40 (11.6)  | 16 (4.6)  | 2 (0.6) |
|                                                                                                        | N | 229 (49.8) | 95 (20.7)  | 97 (21.1)  | 34 (7.4)  | 5 (1.1) |
| Experienced side effects (e.g. cold hands or feet/ going to the toilet at night) from your medication? | D | 151 (43.6) | 82 (23.7)  | 73 (21.1)  | 34 (9.8)  | 6 (1.7) |
|                                                                                                        | N | 182 (39.1) | 99 (21.2)  | 121 (26.0) | 55 (11.8) | 9 (1.9) |

**Abbreviations:** D: Denmark, N: Norway.

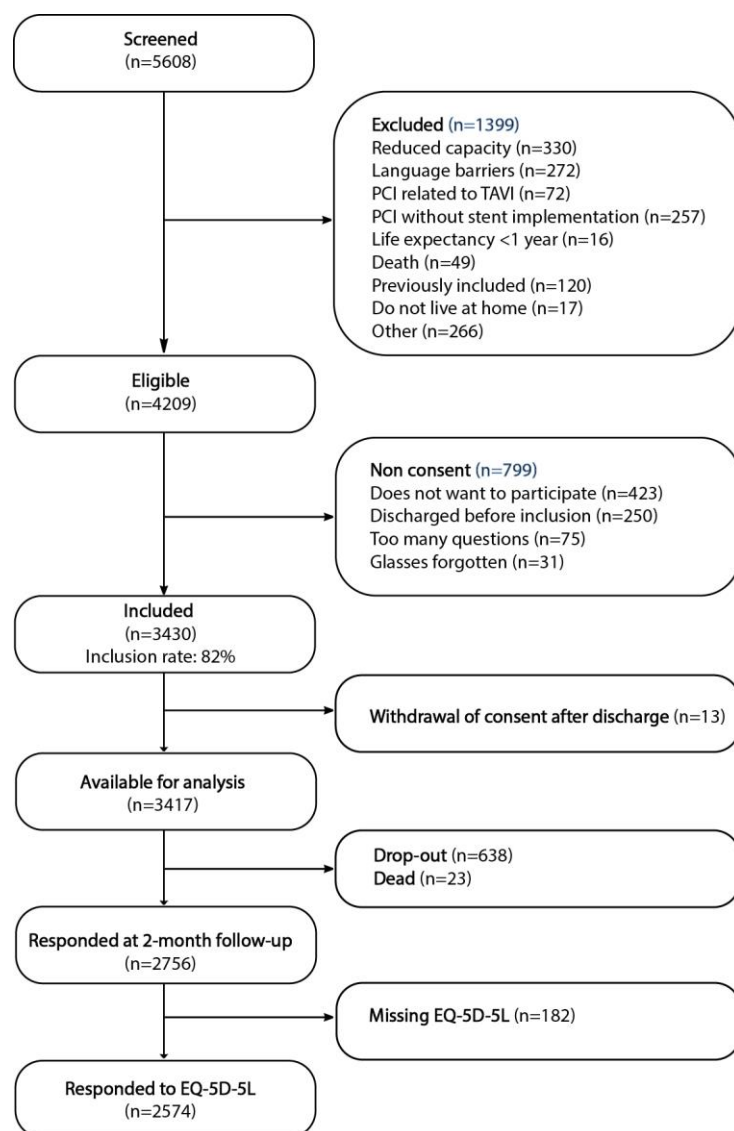

**Supplemental Figure 1.** Flowchart of inclusion of patients after percutaneous coronary intervention in the CONCARD<sup>PCI</sup> study (n=2574).

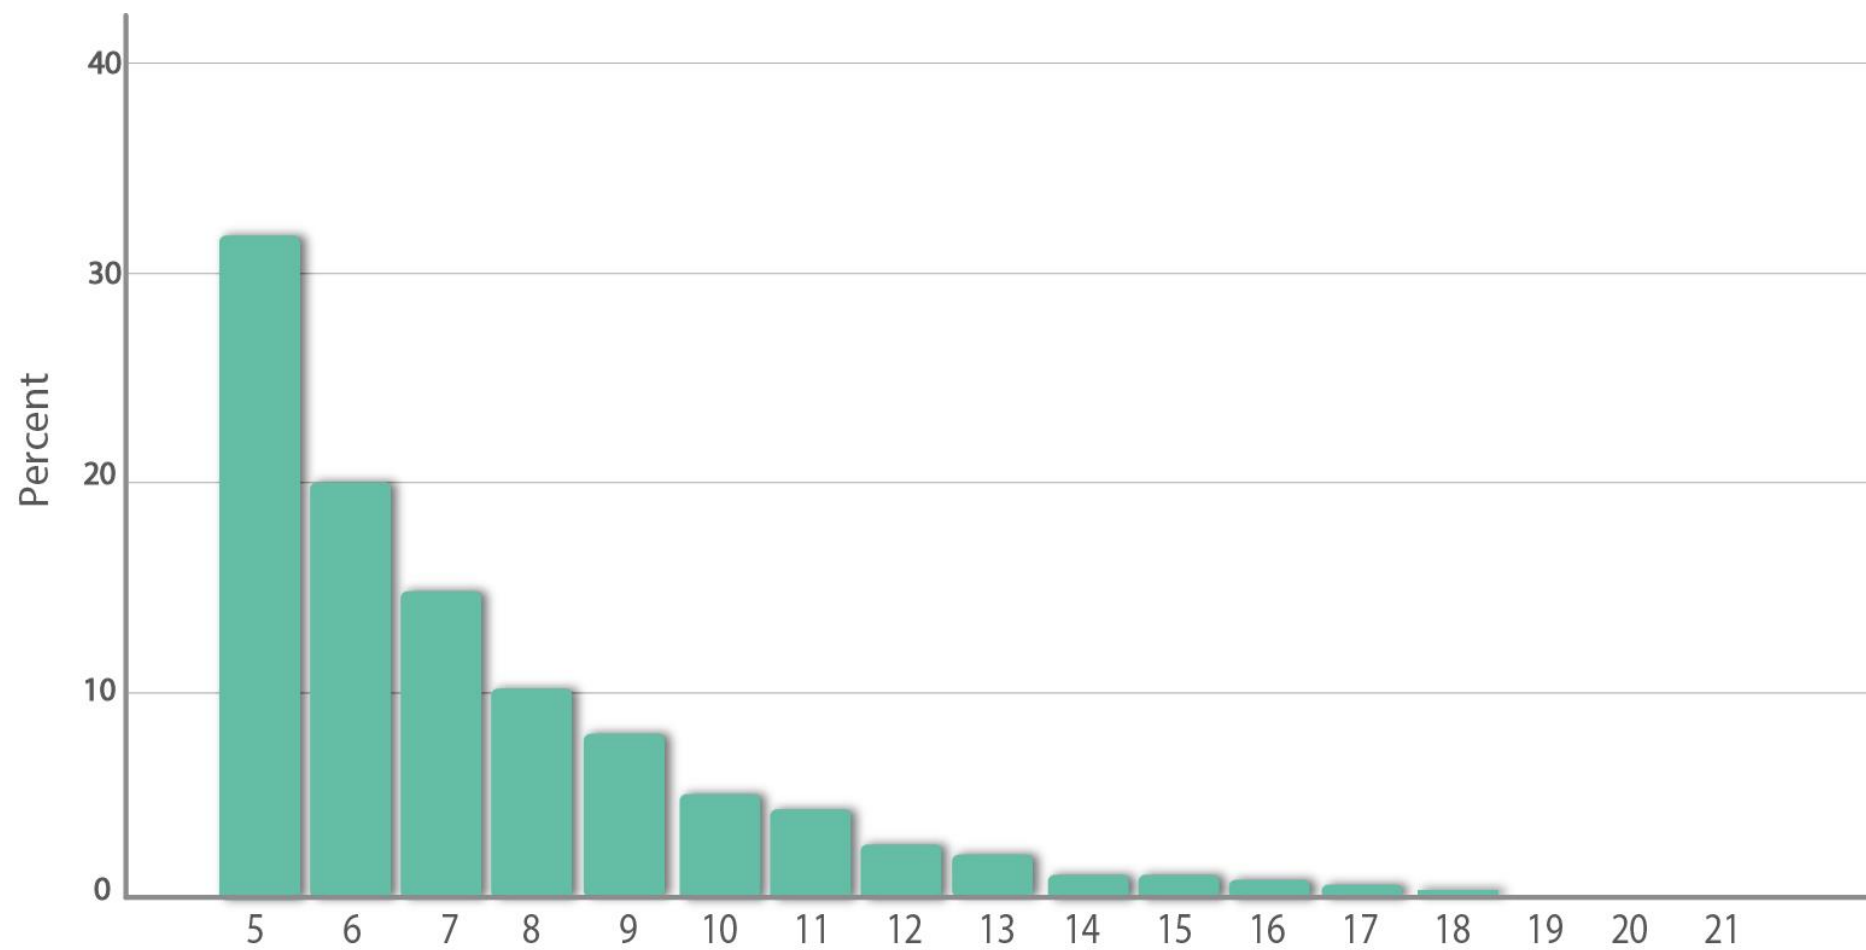

**Supplemental Figure 2.** Distribution of EQ-5D-5L total score in patients after percutaneous coronary intervention in the CONCARD<sup>PCI</sup> study (n=2574).

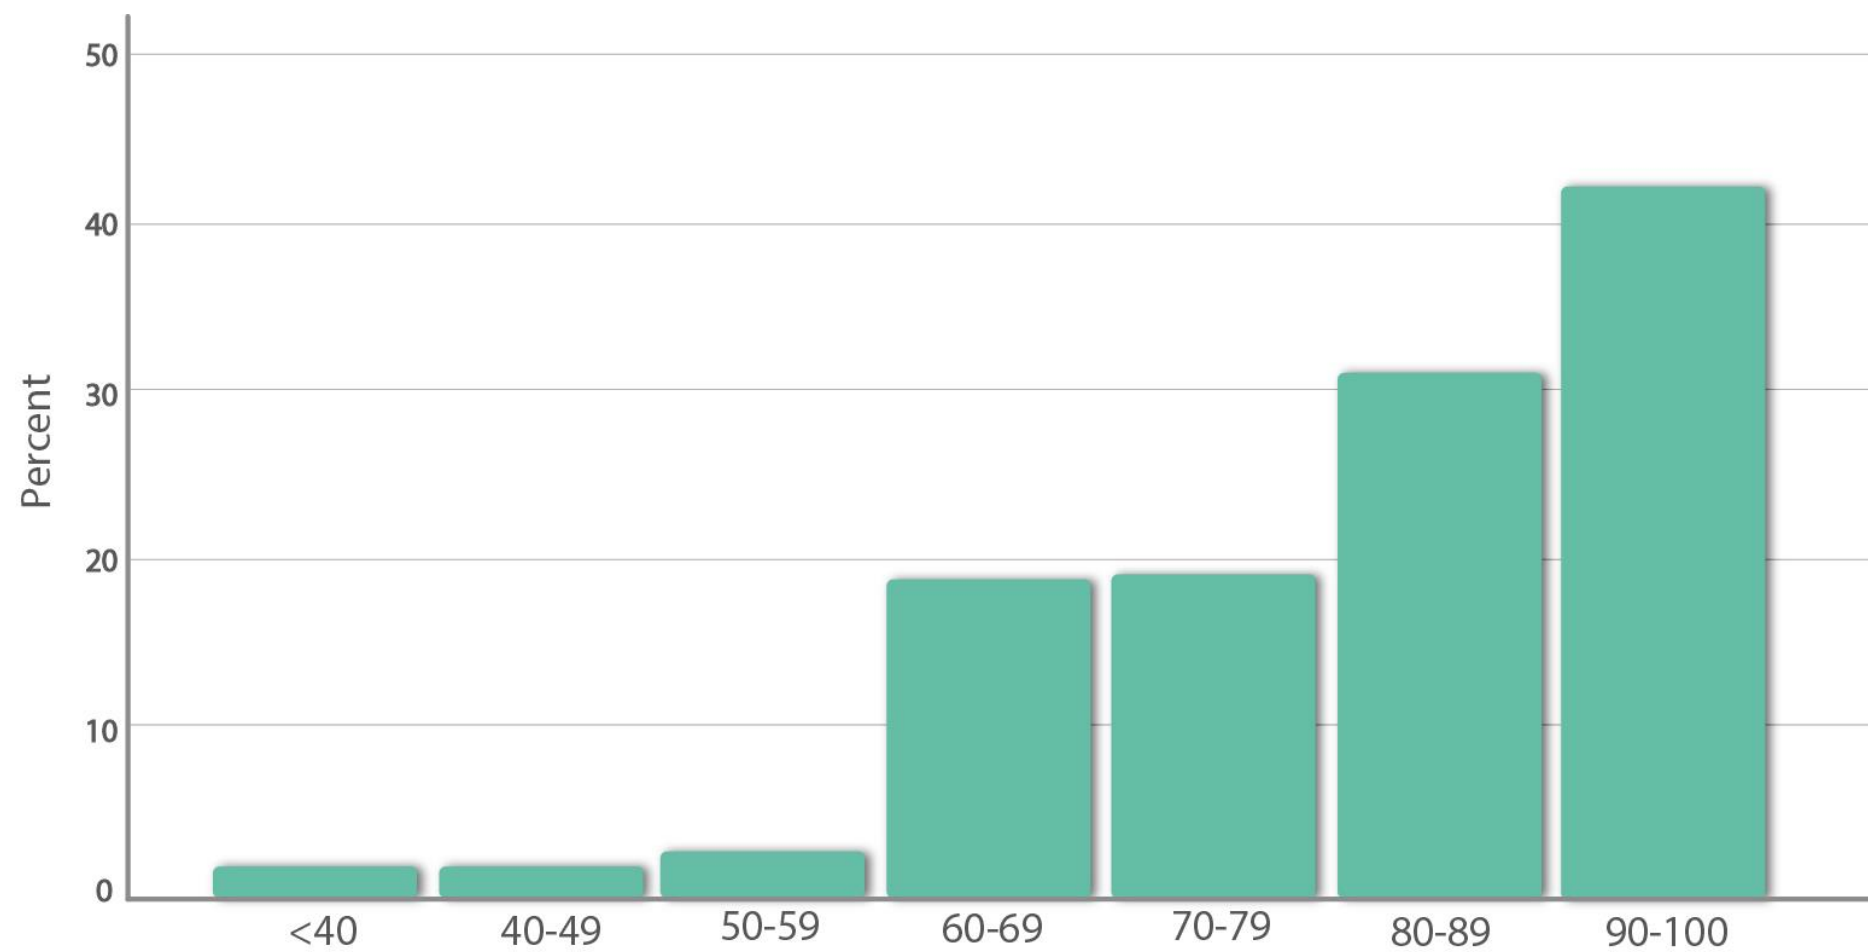

**Supplemental Figure 3.** Perfect scorers' rating on overall health (EQ-VAS) in the CONCARD<sup>PCI</sup> study.

# Perfect health, not so perfect after all

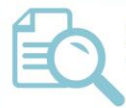

**Study design:**

Prospective  
multicentre  
cohort study

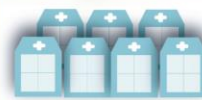

Seven PCI  
centres

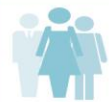

**Population:**

2574 patients  
after PCI

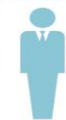

78% men  
Mean age 66 years  
(SD11)

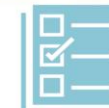

Serial-measures  
of patient-reported  
outcomes

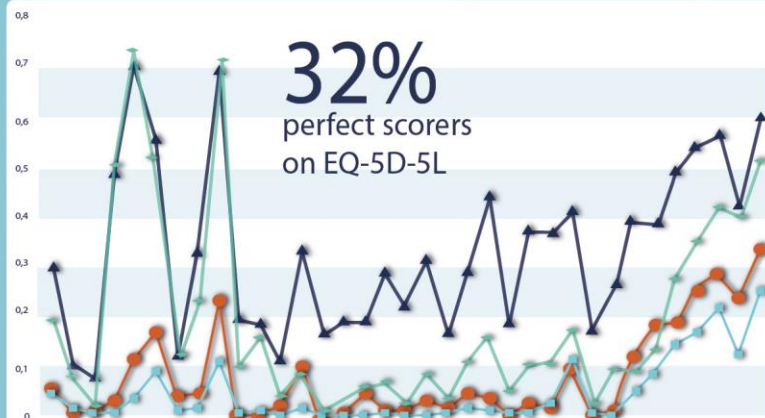

**Figure 1:** Proportion of perfect EQ-5D-5L scorers who have experienced challenges in the 35 Myocardial Infarction Dimensional Assessments Scale (MIDAS) items. **Class 1:** 'Major fatigue and side effects.' **Class 2:** 'Only some fatigue and side effects.' **Class 3:** 'Poor cardiac quality of life.' **Class 4:** 'Good cardiac quality of life.'

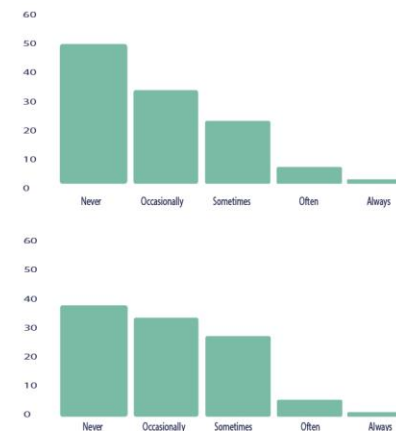

**Figure 2:** Response from perfect scorers on generic EQ-5D-5L to single items on disease-specific MIDAS.

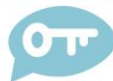

To obtain an accurate picture of patients' health, both generic and disease-specific patient-reported outcomes measures are needed to capture the distinct problems that patients with a specific health condition experience.

**Supplemental Figure 4.** Summary of the main results.
